# Supplementary material
Source: bioRxiv or medRxiv preprint supplement (https://www.biorxiv.org/highwire/filestream/69036/field_highwire_adjunct_files/1/216754-10.pdf)
Supplement: Supplementary file [file 216754-10.pdf]

Supplementary Table 1: (a) Top driver genes regulating modules enriched in major pathways of cancer.

(b) Alterations of the top drivers across all cancer sites

(c) Comparison of average number of enriched gene sets per module in 100 random permutations vs. the actual modules per cancer.

(a) Top driver genes regulating modules enriched in major pathways of cancer

Angiogenesis (43 enriched modules)

|                            | BLCA | BRCA | COADREAD | GBM | HNSC | KIRC | LAML | LUAD | LUSC | OV | UCEC | Total number of regulated modules |
|----------------------------|------|------|----------|-----|------|------|------|------|------|----|------|-----------------------------------|
| Number of enriched modules | 6    | 3    | 3        | 7   | 4    | 4    | 2    | 3    | 2    | 6  | 3    | 43                                |
| FSTL1                      | 2    | 1    | 0        | 0   | 0    | 0    | 0    | 1    | 1    | 1  | 2    | 8                                 |
| EMILIN1                    | 0    | 0    | 0        | 1   | 0    | 0    | 0    | 2    | 1    | 1  | 2    | 7                                 |
| BIRC3                      | 2    | 0    | 0        | 3   | 0    | 0    | 0    | 0    | 0    | 0  | 0    | 5                                 |
| SOCS3                      | 2    | 0    | 2        | 0   | 0    | 0    | 0    | 0    | 0    | 0  | 0    | 4                                 |
| CD248                      | 3    | 0    | 0        | 0   | 0    | 0    | 1    | 0    | 0    | 0  | 0    | 4                                 |
| PPP1R3B                    | 0    | 0    | 0        | 4   | 0    | 0    | 0    | 0    | 0    | 0  | 0    | 4                                 |
| NUAK1                      | 0    | 0    | 1        | 0   | 0    | 0    | 0    | 1    | 0    | 1  | 0    | 3                                 |
| SPARCL1                    | 1    | 0    | 0        | 0   | 0    | 0    | 0    | 2    | 0    | 0  | 0    | 3                                 |
| CIS                        | 2    | 0    | 0        | 1   | 0    | 0    | 0    | 0    | 0    | 0  | 0    | 3                                 |
| IL1B                       | 1    | 0    | 0        | 0   | 1    | 0    | 0    | 0    | 0    | 1  | 0    | 3                                 |
| OLFML1                     | 0    | 1    | 0        | 0   | 0    | 0    | 0    | 0    | 0    | 0  | 2    | 3                                 |
| ANGPTL2                    | 0    | 1    | 0        | 0   | 0    | 0    | 0    | 0    | 1    | 0  | 1    | 3                                 |
| CDO1                       | 0    | 0    | 1        | 0   | 0    | 0    | 0    | 1    | 0    | 0  | 0    | 2                                 |
| MSC                        | 2    | 0    | 0        | 0   | 0    | 0    | 0    | 0    | 0    | 0  | 0    | 2                                 |
| MME                        | 0    | 0    | 1        | 0   | 1    | 0    | 0    | 0    | 0    | 0  | 0    | 2                                 |
| SRPX2                      | 0    | 0    | 0        | 2   | 0    | 0    | 0    | 0    | 0    | 0  | 0    | 2                                 |
| CLIP3                      | 2    | 0    | 0        | 0   | 0    | 0    | 0    | 0    | 0    | 0  | 0    | 2                                 |
| WIPF1                      | 2    | 0    | 0        | 0   | 0    | 0    | 0    | 0    | 0    | 0  | 0    | 2                                 |
| VIM                        | 1    | 0    | 0        | 0   | 1    | 0    | 0    | 0    | 0    | 0  | 0    | 2                                 |
| RCN3                       | 2    | 0    | 0        | 0   | 0    | 0    | 0    | 0    | 0    | 0  | 0    | 2                                 |
| PDLIM2                     | 2    | 0    | 0        | 0   | 0    | 0    | 0    | 0    | 0    | 0  | 0    | 2                                 |
| SERPINB1                   | 1    | 0    | 0        | 0   | 0    | 0    | 0    | 0    | 0    | 1  | 0    | 2                                 |
| MCL1                       | 2    | 0    | 0        | 0   | 0    | 0    | 0    | 0    | 0    | 0  | 0    | 2                                 |
| TRIP13                     | 0    | 1    | 0        | 0   | 0    | 0    | 0    | 0    | 0    | 1  | 0    | 2                                 |
| CHEK1                      | 0    | 0    | 0        | 0   | 0    | 0    | 0    | 1    | 0    | 1  | 0    | 2                                 |
| MIDN                       | 1    | 0    | 0        | 0   | 1    | 0    | 0    | 0    | 0    | 0  | 0    | 2                                 |
| ANXA2                      | 0    | 0    | 0        | 2   | 0    | 0    | 0    | 0    | 0    | 0  | 0    | 2                                 |
| DTL                        | 0    | 0    | 0        | 2   | 0    | 0    | 0    | 0    | 0    | 0  | 0    | 2                                 |
| TUBA1C                     | 0    | 0    | 0        | 2   | 0    | 0    | 0    | 0    | 0    | 0  | 0    | 2                                 |
| GPR171                     | 0    | 1    | 0        | 0   | 0    | 0    | 0    | 0    | 1    | 0  | 0    | 2                                 |
| MMP14                      | 0    | 0    | 0        | 1   | 0    | 0    | 0    | 0    | 1    | 0  | 0    | 2                                 |
| INHBA                      | 0    | 0    | 0        | 0   | 2    | 0    | 0    | 0    | 0    | 0  | 0    | 2                                 |
| DDR2                       | 0    | 0    | 0        | 0   | 0    | 0    | 0    | 1    | 0    | 0  | 1    | 2                                 |
| CCL5                       | 0    | 1    | 0        | 0   | 0    | 0    | 0    | 0    | 0    | 0  | 1    | 2                                 |
| PTPN7                      | 0    | 1    | 0        | 0   | 0    | 0    | 0    | 0    | 0    | 0  | 1    | 2                                 |
| PTPRCAP                    | 0    | 1    | 0        | 0   | 0    | 0    | 0    | 0    | 0    | 0  | 1    | 2                                 |
| RRM2                       | 0    | 1    | 0        | 0   | 0    | 0    | 0    | 1    | 0    | 0  | 0    | 2                                 |
| SNRK                       | 0    | 0    | 0        | 0   | 0    | 0    | 0    | 2    | 0    | 0  | 0    | 2                                 |
| KNTC1                      | 0    | 1    | 0        | 0   | 0    | 0    | 0    | 1    | 0    | 0  | 0    | 2                                 |
| ACTA2                      | 0    | 0    | 0        | 0   | 0    | 0    | 0    | 0    | 0    | 1  | 1    | 2                                 |
| PCOLCE                     | 0    | 1    | 0        | 0   | 0    | 0    | 0    | 0    | 0    | 1  | 0    | 2                                 |
| CTSK                       | 0    | 1    | 0        | 0   | 0    | 0    | 0    | 0    | 0    | 0  | 1    | 2                                 |
| CD247                      | 0    | 1    | 0        | 0   | 0    | 0    | 0    | 0    | 0    | 0  | 1    | 2                                 |
| CD27                       | 0    | 1    | 0        | 0   | 0    | 0    | 1    | 0    | 0    | 0  | 0    | 2                                 |
| GLT25D2                    | 0    | 0    | 0        | 0   | 0    | 0    | 2    | 0    | 0    | 0  | 0    | 2                                 |

Hypoxia (44 enriched modules)

|                            | BLCA | BRCA | COADREAD | GBM | HNSC | KIRC | LAML | LUAD | LUSC | OV | UCEC | Total number of regulated modules |
|----------------------------|------|------|----------|-----|------|------|------|------|------|----|------|-----------------------------------|
| Number of enriched modules | 4    | 2    | 3        | 8   | 3    | 2    | 2    | 7    | 1    | 10 | 2    | 44                                |
| BIRC3                      | 2    | 0    | 0        | 3   | 0    | 0    | 0    | 0    | 0    | 0  | 0    | 5                                 |
| SRPX2                      | 0    | 0    | 0        | 4   | 0    | 0    | 0    | 1    | 0    | 0  | 0    | 5                                 |
| PPP1R3B                    | 0    | 0    | 0        | 5   | 0    | 0    | 0    | 0    | 0    | 0  | 0    | 5                                 |
| CD248                      | 2    | 0    | 1        | 0   | 0    | 0    | 1    | 0    | 0    | 0  | 0    | 4                                 |
| CHEK1                      | 0    | 0    | 0        | 0   | 0    | 0    | 0    | 2    | 0    | 2  | 0    | 4                                 |
| IL1B                       | 1    | 0    | 0        | 0   | 1    | 0    | 0    | 0    | 0    | 2  | 0    | 4                                 |

|          |   |   |   |   |   |   |   |   |   |   |   |   |   |
|----------|---|---|---|---|---|---|---|---|---|---|---|---|---|
| WIPF1    | 2 | 0 | 0 | 0 | 0 | 0 | 0 | 0 | 0 | 0 | 0 | 1 | 3 |
| CIS      | 2 | 0 | 0 | 1 | 0 | 0 | 0 | 0 | 0 | 0 | 0 | 0 | 3 |
| MCL1     | 2 | 0 | 0 | 0 | 0 | 0 | 0 | 0 | 0 | 1 | 0 | 3 |   |
| SOCS3    | 2 | 0 | 1 | 0 | 0 | 0 | 0 | 0 | 0 | 0 | 0 | 3 |   |
| KNTC1    | 0 | 1 | 0 | 0 | 0 | 0 | 0 | 2 | 0 | 0 | 0 | 3 |   |
| ACTA2    | 0 | 0 | 0 | 0 | 0 | 0 | 0 | 0 | 0 | 3 | 0 | 3 |   |
| NUAK1    | 0 | 0 | 1 | 0 | 0 | 0 | 0 | 0 | 0 | 2 | 0 | 3 |   |
| MME      | 0 | 0 | 1 | 0 | 2 | 0 | 0 | 0 | 0 | 0 | 0 | 3 |   |
| DTL      | 0 | 0 | 0 | 2 | 0 | 0 | 0 | 0 | 0 | 1 | 0 | 3 |   |
| FAM83D   | 0 | 0 | 0 | 0 | 0 | 0 | 0 | 3 | 0 | 0 | 0 | 3 |   |
| NNMT     | 0 | 0 | 0 | 0 | 0 | 0 | 0 | 0 | 0 | 3 | 0 | 3 |   |
| EV12A    | 0 | 0 | 0 | 0 | 0 | 0 | 0 | 0 | 0 | 3 | 0 | 3 |   |
| ALPK2    | 0 | 0 | 0 | 0 | 0 | 0 | 0 | 0 | 0 | 3 | 0 | 3 |   |
| CD274    | 2 | 0 | 0 | 0 | 0 | 0 | 0 | 0 | 0 | 0 | 0 | 2 |   |
| BATF     | 0 | 0 | 0 | 2 | 0 | 0 | 0 | 0 | 0 | 0 | 0 | 2 |   |
| FSYL1    | 1 | 0 | 0 | 0 | 0 | 0 | 0 | 0 | 0 | 1 | 0 | 2 |   |
| SERPINB1 | 1 | 0 | 0 | 0 | 0 | 0 | 0 | 0 | 0 | 1 | 0 | 2 |   |
| TRIP13   | 0 | 1 | 0 | 0 | 0 | 0 | 0 | 0 | 0 | 1 | 0 | 2 |   |
| C16orf54 | 0 | 1 | 1 | 0 | 0 | 0 | 0 | 0 | 0 | 0 | 0 | 2 |   |
| RRM2     | 0 | 1 | 0 | 0 | 0 | 0 | 0 | 1 | 0 | 0 | 0 | 2 |   |
| GPR171   | 0 | 1 | 0 | 0 | 1 | 0 | 0 | 0 | 0 | 0 | 0 | 2 |   |
| TRIM22   | 0 | 0 | 1 | 1 | 0 | 0 | 0 | 0 | 0 | 0 | 0 | 2 |   |
| ATP10A   | 0 | 0 | 1 | 0 | 0 | 0 | 0 | 1 | 0 | 0 | 0 | 2 |   |
| PTPRC    | 0 | 1 | 0 | 0 | 0 | 0 | 0 | 0 | 0 | 0 | 1 | 2 |   |
| TGFB3    | 0 | 0 | 1 | 0 | 0 | 0 | 0 | 0 | 0 | 1 | 0 | 2 |   |
| SLA      | 0 | 0 | 0 | 1 | 0 | 0 | 0 | 0 | 0 | 0 | 1 | 2 |   |
| ANXA2    | 0 | 0 | 0 | 2 | 0 | 0 | 0 | 0 | 0 | 0 | 0 | 2 |   |
| RNF149   | 0 | 0 | 0 | 2 | 0 | 0 | 0 | 0 | 0 | 0 | 0 | 2 |   |
| KIAA0247 | 0 | 0 | 0 | 1 | 0 | 0 | 0 | 0 | 0 | 1 | 0 | 2 |   |
| TUBA1C   | 0 | 0 | 0 | 2 | 0 | 0 | 0 | 0 | 0 | 0 | 0 | 2 |   |
| ACTN1    | 0 | 0 | 0 | 1 | 0 | 0 | 0 | 1 | 0 | 0 | 0 | 2 |   |
| EGLN3    | 0 | 0 | 0 | 0 | 0 | 0 | 0 | 2 | 0 | 0 | 0 | 2 |   |
| ANGPT2   | 0 | 0 | 0 | 0 | 1 | 0 | 0 | 1 | 0 | 0 | 0 | 2 |   |
| GLT2SD2  | 0 | 0 | 0 | 0 | 0 | 0 | 2 | 0 | 0 | 0 | 0 | 2 |   |
| FAP      | 0 | 0 | 0 | 0 | 0 | 0 | 0 | 2 | 0 | 0 | 0 | 2 |   |
| MYBL2    | 0 | 0 | 0 | 0 | 0 | 0 | 0 | 2 | 0 | 0 | 0 | 2 |   |
| RHOH     | 0 | 0 | 0 | 0 | 0 | 0 | 0 | 0 | 0 | 1 | 1 | 2 |   |
| KCNN4    | 0 | 0 | 0 | 0 | 0 | 0 | 0 | 2 | 0 | 0 | 0 | 2 |   |
| LCP2     | 0 | 0 | 0 | 0 | 0 | 0 | 0 | 0 | 0 | 1 | 1 | 2 |   |
| RUNX2    | 0 | 0 | 0 | 0 | 0 | 0 | 0 | 0 | 0 | 2 | 0 | 2 |   |
| PTTG2    | 0 | 0 | 0 | 0 | 0 | 0 | 0 | 0 | 0 | 2 | 0 | 2 |   |
| GPNMB    | 0 | 0 | 0 | 0 | 0 | 0 | 0 | 0 | 0 | 2 | 0 | 2 |   |
| RARRES3  | 0 | 0 | 1 | 0 | 0 | 0 | 1 | 0 | 0 | 0 | 0 | 2 |   |
| ACAP1    | 0 | 0 | 0 | 1 | 0 | 0 | 0 | 0 | 0 | 0 | 0 | 2 |   |
| CD247    | 0 | 0 | 0 | 1 | 0 | 0 | 0 | 0 | 0 | 0 | 0 | 2 |   |
| GPR171   | 0 | 0 | 0 | 1 | 0 | 0 | 0 | 0 | 0 | 0 | 0 | 2 |   |
| AOAH     | 0 | 0 | 0 | 0 | 0 | 0 | 0 | 0 | 0 | 0 | 0 | 2 |   |
| IL2RG    | 0 | 0 | 0 | 0 | 0 | 0 | 0 | 0 | 0 | 0 | 0 | 2 |   |

**Epithelial Mesenchymal Transition (12 enriched modules)**

|                            | BLCA | BRCA | COADREAD | GBM | HNSC | KIRC | LAML | LUAD | LUSC | OV | UCEC | Total number of regulated modules |
|----------------------------|------|------|----------|-----|------|------|------|------|------|----|------|-----------------------------------|
| Number of enriched modules | 1    | 0    | 2        | 1   | 2    | 2    | 0    | 1    | 0    | 3  | 0    | 12                                |
| TGFB3                      | 0    | 0    | 1        | 0   | 0    | 1    | 0    | 0    | 0    | 1  | 0    | 3                                 |
| NUAK1                      | 0    | 0    | 1        | 0   | 0    | 0    | 0    | 0    | 0    | 2  | 0    | 3                                 |
| CD248                      | 1    | 0    | 1        | 0   | 0    | 0    | 0    | 0    | 0    | 0  | 0    | 2                                 |
| FSYL1                      | 0    | 0    | 0        | 0   | 0    | 1    | 0    | 0    | 0    | 1  | 0    | 2                                 |
| MCL1                       | 1    | 0    | 0        | 0   | 0    | 0    | 0    | 0    | 0    | 1  | 0    | 2                                 |
| SOCS3                      | 1    | 0    | 1        | 0   | 0    | 0    | 0    | 0    | 0    | 0  | 0    | 2                                 |
| MIDN                       | 1    | 0    | 0        | 0   | 1    | 0    | 0    | 0    | 0    | 0  | 0    | 2                                 |
| PPP1R15A                   | 0    | 0    | 0        | 0   | 0    | 0    | 0    | 1    | 0    | 1  | 0    | 2                                 |
| NNMT                       | 0    | 0    | 0        | 0   | 0    | 0    | 0    | 0    | 0    | 2  | 0    | 2                                 |
| EV12A                      | 0    | 0    | 0        | 0   | 0    | 0    | 0    | 0    | 0    | 2  | 0    | 2                                 |
| ACTA2                      | 0    | 0    | 0        | 0   | 0    | 0    | 0    | 0    | 0    | 2  | 0    | 2                                 |
| RUNX2                      | 0    | 0    | 0        | 0   | 0    | 0    | 0    | 0    | 0    | 2  | 0    | 2                                 |
| ALPK2                      | 0    | 0    | 0        | 0   | 0    | 0    | 0    | 0    | 0    | 2  | 0    | 2                                 |

**Cell cycle (22 enriched modules)**

|                            | BLCA | BRCA | COADREAD | GBM | HNSC | KIRC | LAML | LUAD | LUSC | OV | UCEC | Total number of regulated modules |
|----------------------------|------|------|----------|-----|------|------|------|------|------|----|------|-----------------------------------|
| Number of enriched modules | 1    | 2    | 1        | 3   | 1    | 2    | 2    | 3    | 1    | 5  | 1    | 22                                |
| HIST1H2AE                  | 1    | 1    | 1        | 0   | 0    | 0    | 0    | 1    | 1    | 0  | 1    | 6                                 |
| CHEK1                      | 0    | 0    | 0        | 0   | 0    | 0    | 0    | 2    | 0    | 2  | 0    | 4                                 |
| HIST1H3G                   | 1    | 0    | 1        | 0   | 1    | 0    | 0    | 0    | 0    | 0  | 0    | 3                                 |
| KNTC1                      | 0    | 1    | 0        | 0   | 0    | 0    | 0    | 2    | 0    | 0  | 0    | 3                                 |
| HIST1H2BJ                  | 0    | 1    | 0        | 0   | 0    | 0    | 0    | 1    | 1    | 0  | 0    | 3                                 |
| HIST1H3H                   | 0    | 1    | 0        | 0   | 0    | 1    | 0    | 0    | 1    | 0  | 0    | 3                                 |
| DTL                        | 0    | 0    | 0        | 2   | 0    | 0    | 0    | 0    | 0    | 1  | 0    | 3                                 |
| NCAPG2                     | 0    | 0    | 0        | 0   | 0    | 1    | 1    | 0    | 0    | 1  | 0    | 3                                 |
| TPX2                       | 0    | 0    | 0        | 0   | 0    | 0    | 0    | 0    | 0    | 2  | 0    | 2                                 |
| TRIP13                     | 0    | 1    | 0        | 0   | 0    | 0    | 0    | 0    | 0    | 1  | 0    | 2                                 |
| RRM2                       | 0    | 1    | 0        | 0   | 0    | 0    | 0    | 1    | 0    | 0  | 0    | 2                                 |
| ENSA                       | 0    | 1    | 0        | 0   | 0    | 0    | 0    | 0    | 1    | 0  | 0    | 2                                 |
| HIST1H1D                   | 0    | 1    | 0        | 0   | 0    | 0    | 0    | 0    | 1    | 0  | 0    | 2                                 |
| HIST1H3D                   | 0    | 1    | 0        | 0   | 0    | 0    | 0    | 1    | 0    | 0  | 0    | 2                                 |
| HIVEP2                     | 0    | 0    | 0        | 2   | 0    | 0    | 0    | 0    | 0    | 0  | 0    | 2                                 |
| TUBA1C                     | 0    | 0    | 0        | 2   | 0    | 0    | 0    | 0    | 0    | 0  | 0    | 2                                 |
| HINT3                      | 0    | 0    | 0        | 1   | 0    | 1    | 0    | 0    | 0    | 0  | 0    | 2                                 |
| FIG4                       | 0    | 0    | 0        | 0   | 0    | 1    | 0    | 1    | 0    | 0  | 0    | 2                                 |
| MYBL2                      | 0    | 0    | 0        | 0   | 0    | 0    | 0    | 2    | 0    | 0  | 0    | 2                                 |
| EZH2                       | 0    | 0    | 0        | 0   | 0    | 0    | 0    | 0    | 0    | 2  | 0    | 2                                 |
| PTTG2                      | 0    | 0    | 0        | 0   | 0    | 0    | 0    | 0    | 0    | 2  | 0    | 2                                 |

**Immune response (100 enriched modules)**

|                            | BLCA | BRCA | COADREAD | GBM | HNSC | KIRC | LAML | LUAD | LUSC | OV | UCEC | Total number of regulated modules |
|----------------------------|------|------|----------|-----|------|------|------|------|------|----|------|-----------------------------------|
| Number of enriched modules | 11   | 8    | 8        | 9   | 12   | 7    | 7    | 9    | 9    | 11 | 9    | 100                               |
| CCL5                       | 0    | 2    | 0        | 0   | 2    | 1    | 0    | 2    | 2    | 3  | 2    | 14                                |
| TNFAIP8L2                  | 7    | 1    | 0        | 1   | 0    | 0    | 0    | 0    | 0    | 0  | 1    | 10                                |
| IL2RB                      | 6    | 0    | 0        | 0   | 0    | 0    | 1    | 3    | 0    | 0  | 0    | 10                                |
| GPR171                     | 0    | 2    | 0        | 1   | 4    | 0    | 0    | 0    | 2    | 1  | 0    | 10                                |
| BIRC3                      | 6    | 0    | 0        | 3   | 0    | 0    | 0    | 0    | 0    | 0  | 0    | 9                                 |
| OAS2                       | 1    | 1    | 0        | 1   | 1    | 0    | 1    | 1    | 1    | 1  | 1    | 9                                 |
| TRIM22                     | 0    | 0    | 3        | 1   | 1    | 0    | 0    | 1    | 1    | 2  | 0    | 9                                 |
| TBC1D10C                   | 0    | 0    | 0        | 1   | 7    | 1    | 0    | 0    | 0    | 0  | 0    | 9                                 |
| PPP1R16B                   | 3    | 1    | 0        | 0   | 0    | 0    | 0    | 2    | 2    | 0  | 0    | 8                                 |
| RARRES3                    | 2    | 0    | 0        | 2   | 1    | 0    | 0    | 1    | 0    | 1  | 1    | 8                                 |
| LAPTM5                     | 0    | 1    | 0        | 0   | 0    | 2    | 0    | 0    | 0    | 3  | 2    | 8                                 |
| DOK2                       | 0    | 1    | 4        | 0   | 0    | 0    | 0    | 0    | 0    | 2  | 1    | 8                                 |
| SLA                        | 0    | 0    | 3        | 3   | 0    | 0    | 0    | 0    | 0    | 0  | 2    | 8                                 |
| LCP1                       | 0    | 0    | 0        | 0   | 4    | 1    | 0    | 3    | 0    | 0  | 0    | 8                                 |
| GBP4                       | 0    | 0    | 0        | 0   | 4    | 0    | 0    | 2    | 1    | 1  | 0    | 8                                 |
| LCP2                       | 0    | 0    | 0        | 0   | 0    | 0    | 0    | 0    | 1    | 4  | 3    | 8                                 |
| PREX1                      | 0    | 0    | 0        | 0   | 7    | 0    | 0    | 0    | 0    | 0  | 0    | 7                                 |
| WIPF1                      | 5    | 0    | 0        | 0   | 0    | 0    | 0    | 0    | 0    | 0  | 1    | 6                                 |
| CTSS                       | 1    | 0    | 0        | 0   | 5    | 0    | 0    | 0    | 0    | 0  | 0    | 6                                 |
| PTPN7                      | 0    | 3    | 0        | 0   | 0    | 1    | 0    | 0    | 0    | 0  | 2    | 6                                 |
| GPR65                      | 0    | 1    | 0        | 0   | 0    | 1    | 0    | 4    | 0    | 0  | 0    | 6                                 |
| DAPP1                      | 0    | 0    | 1        | 2   | 0    | 2    | 0    | 0    | 0    | 0  | 1    | 6                                 |
| PLEK                       | 0    | 0    | 0        | 1   | 0    | 0    | 0    | 0    | 0    | 3  | 2    | 6                                 |
| PTPN22                     | 0    | 0    | 0        | 1   | 0    | 0    | 0    | 1    | 3    | 1  | 0    | 6                                 |
| NCF2                       | 0    | 0    | 0        | 0   | 0    | 1    | 0    | 0    | 1    | 3  | 1    | 6                                 |
| RCSL1                      | 0    | 0    | 0        | 0   | 0    | 0    | 0    | 3    | 3    | 0  | 0    | 6                                 |
| C1S                        | 3    | 0    | 0        | 1   | 1    | 0    | 0    | 0    | 0    | 0  | 0    | 5                                 |
| CD274                      | 4    | 0    | 0        | 0   | 0    | 0    | 0    | 1    | 0    | 0  | 0    | 5                                 |
| SOCS3                      | 2    | 0    | 2        | 0   | 0    | 0    | 0    | 0    | 0    | 0  | 1    | 5                                 |
| IL1B                       | 1    | 0    | 0        | 0   | 1    | 0    | 0    | 0    | 0    | 3  | 0    | 5                                 |
| ACAP1                      | 0    | 4    | 0        | 0   | 0    | 1    | 0    | 0    | 0    | 0  | 0    | 5                                 |
| PTPRCAP                    | 0    | 2    | 0        | 0   | 0    | 1    | 0    | 0    | 0    | 1  | 1    | 5                                 |
| SLAMF8                     | 0    | 2    | 0        | 0   | 0    | 1    | 0    | 0    | 0    | 0  | 2    | 5                                 |
| NCKAP1L                    | 0    | 0    | 2        | 0   | 0    | 3    | 0    | 0    | 0    | 0  | 0    | 5                                 |
| CD6                        | 0    | 0    | 0        | 1   | 4    | 0    | 0    | 0    | 0    | 0  | 0    | 5                                 |
| PTPRC                      | 0    | 1    | 0        | 0   | 0    | 0    | 0    | 3    | 0    | 0  | 1    | 5                                 |
| FPR2                       | 0    | 0    | 4        | 0   | 0    | 0    | 1    | 0    | 0    | 0  | 0    | 5                                 |
| PPP1R3B                    | 0    | 0    | 0        | 4   | 0    | 0    | 1    | 0    | 0    | 0  | 0    | 5                                 |
| SLCO2B1                    | 0    | 0    | 0        | 0   | 0    | 1    | 0    | 0    | 0    | 3  | 1    | 5                                 |
| ITK                        | 0    | 0    | 0        | 0   | 0    | 0    | 1    | 0    | 4    | 0  | 0    | 5                                 |

|      |   |   |   |   |   |   |   |   |   |   |   |   |   |
|------|---|---|---|---|---|---|---|---|---|---|---|---|---|
| CD5  | 0 | 0 | 0 | 0 | 0 | 0 | 0 | 0 | 2 | 2 | 1 | 0 | 5 |
| RHOH | 0 | 0 | 0 | 0 | 0 | 0 | 0 | 0 | 1 | 0 | 3 | 1 | 5 |

**Apoptosis (50 enriched modules)**

|                            | BLCA | BRCA | COADREAD | GBM | HNSC | KIRC | LAML | LUAD | LUSC | OV | UCEC | Total number of regulated modules |
|----------------------------|------|------|----------|-----|------|------|------|------|------|----|------|-----------------------------------|
| Number of enriched modules | 3    | 3    | 3        | 11  | 4    | 5    | 1    | 3    | 3    | 9  | 5    | 50                                |
| OAS2                       | 1    | 1    | 0        | 1   | 2    | 0    | 0    | 1    | 1    | 1  | 1    | 9                                 |
| TRIM22                     | 0    | 0    | 1        | 1   | 2    | 0    | 0    | 0    | 1    | 1  | 0    | 6                                 |
| BIRC3                      | 2    | 0    | 0        | 3   | 0    | 0    | 0    | 0    | 0    | 0  | 0    | 5                                 |
| RARRES3                    | 0    | 0    | 0        | 2   | 0    | 0    | 0    | 1    | 0    | 1  | 0    | 4                                 |
| PARP9                      | 2    | 0    | 0        | 0   | 0    | 0    | 0    | 0    | 1    | 0  | 1    | 4                                 |
| IL1B                       | 1    | 0    | 0        | 0   | 1    | 0    | 0    | 0    | 0    | 2  | 0    | 4                                 |
| CCL5                       | 0    | 1    | 0        | 0   | 0    | 0    | 0    | 0    | 1    | 1  | 1    | 4                                 |
| PSMB8                      | 0    | 1    | 0        | 2   | 0    | 0    | 0    | 0    | 0    | 1  | 0    | 4                                 |
| BST2                       | 0    | 0    | 1        | 2   | 0    | 0    | 0    | 1    | 0    | 0  | 0    | 4                                 |
| SRPX2                      | 0    | 0    | 0        | 3   | 0    | 1    | 0    | 0    | 0    | 0  | 0    | 4                                 |
| CD274                      | 3    | 0    | 0        | 0   | 0    | 0    | 0    | 0    | 0    | 0  | 0    | 3                                 |
| IRF7                       | 1    | 0    | 0        | 1   | 1    | 0    | 0    | 0    | 0    | 0  | 0    | 3                                 |
| SP100                      | 0    | 0    | 0        | 0   | 1    | 0    | 0    | 1    | 1    | 0  | 0    | 3                                 |
| BATF2                      | 0    | 1    | 0        | 0   | 0    | 0    | 0    | 0    | 1    | 1  | 0    | 3                                 |
| ETV7                       | 0    | 1    | 0        | 0   | 1    | 0    | 0    | 0    | 0    | 0  | 1    | 3                                 |
| MX2                        | 0    | 1    | 0        | 0   | 1    | 0    | 0    | 0    | 0    | 1  | 0    | 3                                 |
| OAS1                       | 0    | 1    | 0        | 0   | 0    | 0    | 0    | 0    | 0    | 1  | 1    | 3                                 |
| PPP1R3B                    | 0    | 0    | 0        | 3   | 0    | 0    | 0    | 0    | 0    | 0  | 0    | 3                                 |
| IFI35                      | 0    | 0    | 0        | 1   | 0    | 0    | 0    | 0    | 0    | 1  | 1    | 3                                 |
| EPSTI1                     | 0    | 0    | 0        | 0   | 2    | 0    | 0    | 0    | 0    | 0  | 1    | 3                                 |
| XAF1                       | 0    | 0    | 0        | 0   | 0    | 0    | 0    | 0    | 1    | 1  | 1    | 3                                 |

**Metastases (85 enriched modules)**

|                            | BLCA | BRCA | COADREAD | GBM | HNSC | KIRC | LAML | LUAD | LUSC | OV | UCEC | Total number of regulated modules |
|----------------------------|------|------|----------|-----|------|------|------|------|------|----|------|-----------------------------------|
| Number of enriched modules | 11   | 7    | 6        | 7   | 9    | 6    | 2    | 7    | 10   | 14 | 6    | 85                                |
| FSTL1                      | 2    | 1    | 0        | 0   | 0    | 1    | 0    | 1    | 2    | 3  | 2    | 12                                |
| EMILIN1                    | 0    | 0    | 0        | 1   | 0    | 0    | 0    | 1    | 1    | 1  | 3    | 7                                 |
| GJB5                       | 1    | 0    | 1        | 0   | 0    | 0    | 0    | 1    | 2    | 0  | 1    | 6                                 |
| CD248                      | 3    | 0    | 1        | 0   | 0    | 0    | 1    | 0    | 0    | 0  | 0    | 5                                 |
| KRT16                      | 2    | 2    | 0        | 0   | 0    | 0    | 0    | 0    | 0    | 1  | 0    | 5                                 |
| OAS2                       | 1    | 1    | 0        | 1   | 0    | 0    | 0    | 0    | 0    | 1  | 1    | 5                                 |
| IL1RN                      | 1    | 0    | 0        | 0   | 0    | 0    | 0    | 0    | 4    | 0  | 0    | 5                                 |
| NUAK1                      | 0    | 0    | 1        | 0   | 0    | 0    | 0    | 1    | 0    | 3  | 0    | 5                                 |
| SDR9C7                     | 0    | 0    | 0        | 0   | 5    | 0    | 0    | 0    | 0    | 0  | 0    | 5                                 |
| BIRC3                      | 2    | 0    | 0        | 2   | 0    | 0    | 0    | 0    | 0    | 0  | 0    | 4                                 |
| IL1B                       | 1    | 0    | 0        | 0   | 1    | 0    | 0    | 0    | 0    | 2  | 0    | 4                                 |
| S100A14                    | 1    | 0    | 0        | 0   | 0    | 0    | 0    | 0    | 2    | 0  | 1    | 4                                 |
| OLFML1                     | 0    | 1    | 0        | 0   | 0    | 0    | 0    | 0    | 0    | 1  | 2    | 4                                 |
| TRIM29                     | 0    | 1    | 0        | 0   | 0    | 0    | 0    | 0    | 1    | 2  | 0    | 4                                 |
| NCCRP1                     | 0    | 1    | 0        | 0   | 3    | 0    | 0    | 0    | 0    | 0  | 0    | 4                                 |
| A2ML1                      | 0    | 1    | 0        | 0   | 0    | 0    | 0    | 0    | 2    | 0  | 1    | 4                                 |
| ACTA2                      | 0    | 0    | 0        | 0   | 0    | 0    | 0    | 0    | 0    | 3  | 1    | 4                                 |
| TGFB3                      | 0    | 0    | 1        | 0   | 0    | 1    | 0    | 0    | 0    | 2  | 0    | 4                                 |
| NNMT                       | 0    | 0    | 0        | 0   | 0    | 0    | 0    | 0    | 0    | 4  | 0    | 4                                 |
| RUNX2                      | 0    | 0    | 0        | 0   | 0    | 0    | 0    | 0    | 0    | 4  | 0    | 4                                 |
| CLIP3                      | 2    | 0    | 0        | 0   | 0    | 0    | 0    | 0    | 0    | 0  | 1    | 3                                 |
| KRT5                       | 1    | 0    | 0        | 0   | 0    | 0    | 0    | 0    | 2    | 0  | 0    | 3                                 |
| TMEM40                     | 1    | 0    | 0        | 0   | 0    | 0    | 0    | 0    | 1    | 1  | 0    | 3                                 |
| MCL1                       | 2    | 0    | 0        | 0   | 0    | 0    | 0    | 0    | 0    | 1  | 0    | 3                                 |
| SOCS3                      | 2    | 0    | 1        | 0   | 0    | 0    | 0    | 0    | 0    | 0  | 0    | 3                                 |
| GNA15                      | 0    | 0    | 0        | 0   | 0    | 0    | 0    | 1    | 2    | 0  | 0    | 3                                 |
| CHEK1                      | 0    | 0    | 0        | 0   | 0    | 0    | 0    | 1    | 0    | 2  | 0    | 3                                 |
| S100A16                    | 1    | 0    | 0        | 0   | 0    | 0    | 0    | 2    | 0    | 0  | 0    | 3                                 |
| PCOLCE                     | 0    | 1    | 0        | 0   | 0    | 0    | 0    | 0    | 0    | 2  | 0    | 3                                 |
| ANGPTL2                    | 0    | 1    | 0        | 0   | 0    | 0    | 0    | 0    | 1    | 0  | 1    | 3                                 |
| KCNJ11                     | 0    | 1    | 0        | 0   | 0    | 1    | 0    | 1    | 0    | 0  | 0    | 3                                 |
| DDR2                       | 0    | 0    | 0        | 0   | 0    | 0    | 0    | 0    | 1    | 1  | 1    | 3                                 |
| OAS1                       | 0    | 1    | 0        | 0   | 0    | 0    | 0    | 0    | 0    | 1  | 1    | 3                                 |
| PSMB8                      | 0    | 1    | 0        | 1   | 0    | 0    | 0    | 0    | 0    | 1  | 0    | 3                                 |
| SFN                        | 0    | 0    | 1        | 0   | 0    | 1    | 0    | 0    | 0    | 0  | 1    | 3                                 |



|          |   |   |   |   |   |   |   |   |   |   |   |   |   |
|----------|---|---|---|---|---|---|---|---|---|---|---|---|---|
| HIVEP2   | 0 | 0 | 0 | 2 | 0 | 0 | 0 | 0 | 0 | 0 | 0 | 0 | 2 |
| KIAA0247 | 0 | 0 | 0 | 0 | 0 | 0 | 0 | 0 | 0 | 0 | 2 | 0 | 2 |
| TUBA1C   | 0 | 0 | 0 | 2 | 0 | 0 | 0 | 0 | 0 | 0 | 0 | 0 | 2 |
| HINT3    | 0 | 0 | 0 | 1 | 0 | 1 | 0 | 0 | 0 | 0 | 0 | 0 | 2 |
| IFI35    | 0 | 0 | 0 | 1 | 0 | 0 | 0 | 0 | 0 | 0 | 1 | 0 | 2 |
| TMEM71   | 0 | 0 | 0 | 0 | 0 | 0 | 0 | 0 | 0 | 0 | 2 | 0 | 2 |
| CHI3L1   | 0 | 0 | 0 | 1 | 0 | 0 | 0 | 0 | 0 | 1 | 1 | 0 | 2 |
| XAF1     | 0 | 0 | 0 | 0 | 0 | 0 | 0 | 0 | 1 | 1 | 1 | 0 | 2 |
| FIG4     | 0 | 0 | 0 | 0 | 0 | 1 | 0 | 1 | 0 | 0 | 0 | 0 | 2 |
| MYBL2    | 0 | 0 | 0 | 0 | 0 | 0 | 0 | 2 | 0 | 0 | 0 | 0 | 2 |
| STMN1    | 0 | 0 | 0 | 0 | 0 | 0 | 0 | 0 | 0 | 2 | 0 | 0 | 2 |
| TMEM140  | 0 | 0 | 0 | 0 | 0 | 0 | 0 | 0 | 0 | 2 | 0 | 0 | 2 |
| EZH2     | 0 | 0 | 0 | 0 | 0 | 0 | 0 | 0 | 0 | 2 | 0 | 0 | 2 |
| PTTG2    | 0 | 0 | 0 | 0 | 0 | 0 | 0 | 0 | 0 | 2 | 0 | 0 | 2 |

(b) Alterations of the top drivers across all cancer sites

|       | BLCA            | BRCA             | COADREAD         | GBM | HNSC             | KIRC             | LAML | LUAD                      | LUSC                      | OV                        | UCEC                      |
|-------|-----------------|------------------|------------------|-----|------------------|------------------|------|---------------------------|---------------------------|---------------------------|---------------------------|
| CHEK1 | Amplified       |                  | Amplified        |     |                  |                  |      | Amplified                 |                           | Amplified                 |                           |
| FSTL1 | Hypo-methylated | Hyper-methylated |                  |     |                  | Hyper-methylated |      | Hyper-methylated          | Hyper-methylated          | Hypo and hyper-methylated | Hypo and hyper-methylated |
| TGFB3 |                 |                  | Hyper-methylated |     |                  | Hyper-methylated |      |                           |                           | Hypo-methylated           |                           |
| NUAK1 |                 |                  | Hyper-methylated |     | Hypo-methylated  |                  |      | Hypo and hyper-methylated | Hypo and hyper-methylated | Hypo-methylated           | Hypo and hyper-methylated |
| CCL5  |                 | Hyper-methylated |                  |     | Hyper-methylated | Hyper-methylated |      | Hyper-methylated          | Hyper-methylated          | Hyper-methylated          | Hyper-methylated          |

(c) Comparison of average number of enriched gene sets per module in 100 random permutations vs. the actual modules per cancer.

| Cancer Site | Permuted data:                                                             | Actual data                                |
|-------------|----------------------------------------------------------------------------|--------------------------------------------|
|             | Average # of gene sets enriched per module, averaged over 100 permutations | Average # of gene sets enriched per module |
| BLCA        | 0.2708                                                                     | 27.19                                      |
| BRCA        | 0.196                                                                      | 23.02                                      |
| COADREAD    | 0.1688                                                                     | 21.12                                      |
| GBM         | 0.3855                                                                     | 35.21                                      |
| HNSC        | 0.3855                                                                     | 25.03                                      |
| KIRC        | 0.1442                                                                     | 20.23                                      |
| LAML        | 0.3289                                                                     | 19.24                                      |
| LUAD        | 0.1403                                                                     | 24.49                                      |
| LUSC        | 0.1931                                                                     | 21.52                                      |
| OV          | 0.4029                                                                     | 39.6                                       |
| UCEC        | 0.2316                                                                     | 23.49                                      |
